# Supplementary material for: Trends of the Dengue Serotype-4 Circulation with Epidemiological, Phylogenetic, and Entomological Insights in Lao PDR between 2015 and 2019
Source: PubMed Central journal article supplement (PMC7557816; doi:10.3390/pathogens9090728), 2020-09-03
Supplement: pathogens-09-00728-s001.pdf [file pathogens-09-00728-s001.pdf]

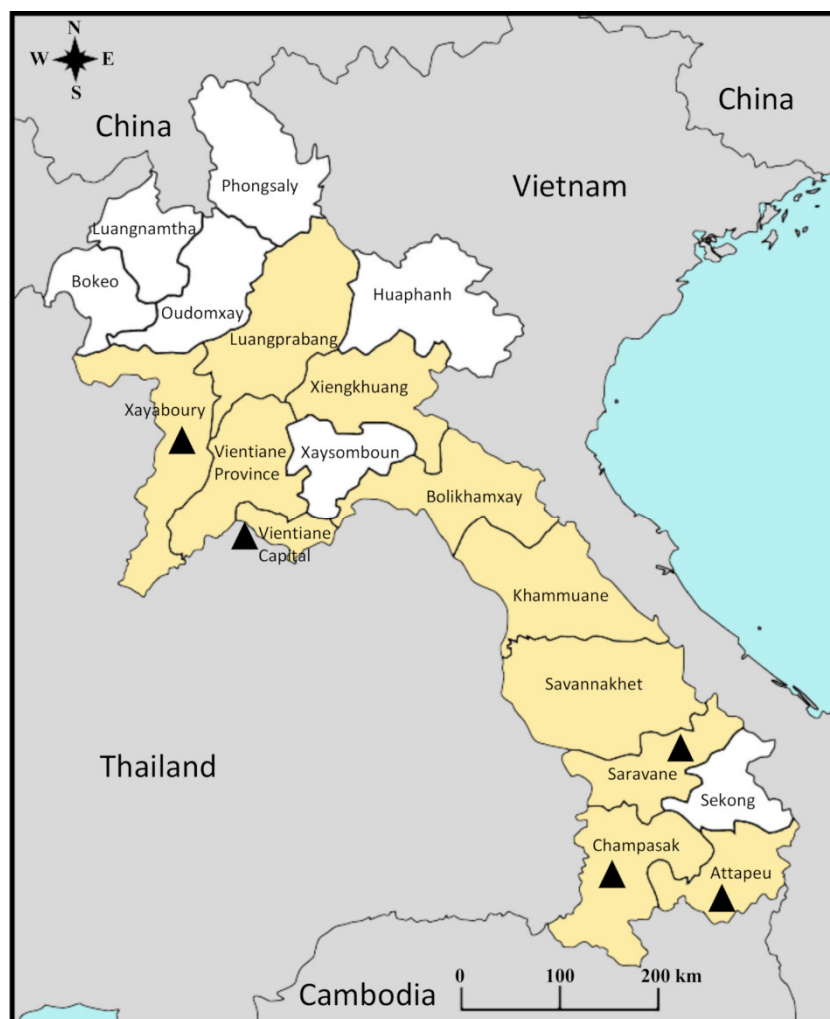

**Figure S1.** Map of Lao PDR. Provinces with DENV-4 reported cases between 2012 and 2019 are in yellow. Triangles indicate the localization of DENV-4 fatal cases.

**Table S1.** Geographic origins of the DENV samples serotyped by the Institut Pasteur du Laos arbovirus surveillance system.

| Province           | 2012       | 2013       | 2014      | 2015      | 2016       | 2017       | 2018       | 2019         | Total        |
|--------------------|------------|------------|-----------|-----------|------------|------------|------------|--------------|--------------|
| Vientiane capital  | 105        | 466        | 8         | 65        | 286        | 644        | 290        | 869          | 2,733        |
| Attapeu            | 0          | 0          | 0         | 25        | 6          | 69         | 111        | 62           | 273          |
| Bokeo              | 0          | 2          | 0         | 0         | 0          | 0          | 0          | 0            | 2            |
| Bolikhamxay        | 0          | 3          | 0         | 0         | 0          | 0          | 2          | 9            | 14           |
| Champassak         | 0          | 1          | 0         | 0         | 0          | 0          | 3          | 41           | 45           |
| Huaphanh           | 0          | 1          | 0         | 0         | 0          | 0          | 0          | 0            | 1            |
| Khammuane          | 0          | 1          | 0         | 0         | 0          | 3          | 0          | 1            | 5            |
| Luangprabang       | 1          | 0          | 0         | 0         | 0          | 0          | 2          | 15           | 18           |
| Oudomexay          | 1          | 0          | 0         | 0         | 0          | 0          | 0          | 1            | 2            |
| Saravane           | 0          | 0          | 0         | 0         | 42         | 150        | 29         | 102          | 323          |
| Savannakhet        | 0          | 0          | 0         | 0         | 0          | 0          | 19         | 25           | 44           |
| Vientiane province | 8          | 38         | 0         | 0         | 0          | 4          | 9          | 37           | 96           |
| Xayaboury          | 0          | 1          | 0         | 0         | 0          | 0          | 1          | 2            | 4            |
| Xaysomboun         | 0          | 0          | 0         | 0         | 0          | 0          | 0          | 1            | 1            |
| Xiengkhuang        | 0          | 0          | 0         | 0         | 0          | 1          | 0          | 12           | 13           |
| Unknown            | 16         | 23         | 3         | 0         | 0          | 0          | 0          | 0            | 42           |
| <b>Total</b>       | <b>131</b> | <b>536</b> | <b>11</b> | <b>90</b> | <b>334</b> | <b>871</b> | <b>466</b> | <b>1,177</b> | <b>3,616</b> |
